# Supplementary material for: SNORA37/CMTR1/ELAVL1 feedback loop drives gastric cancer progression via facilitating CD44 alternative splicing
Source: PubMed Central journal article supplement (PMC11737211; doi:10.1186/s13046-025-03278-x), 2025-01-16
Supplement: 13046_2025_3278_MOESM1_ESM.pdf [file 13046_2025_3278_MOESM1_ESM.pdf]

## Supporting Information

***SNORA37*/CMTR1/ELAVL1 feedback loop drives gastric cancer progression via facilitating *CD44* alternative splicing**

Bao et al.

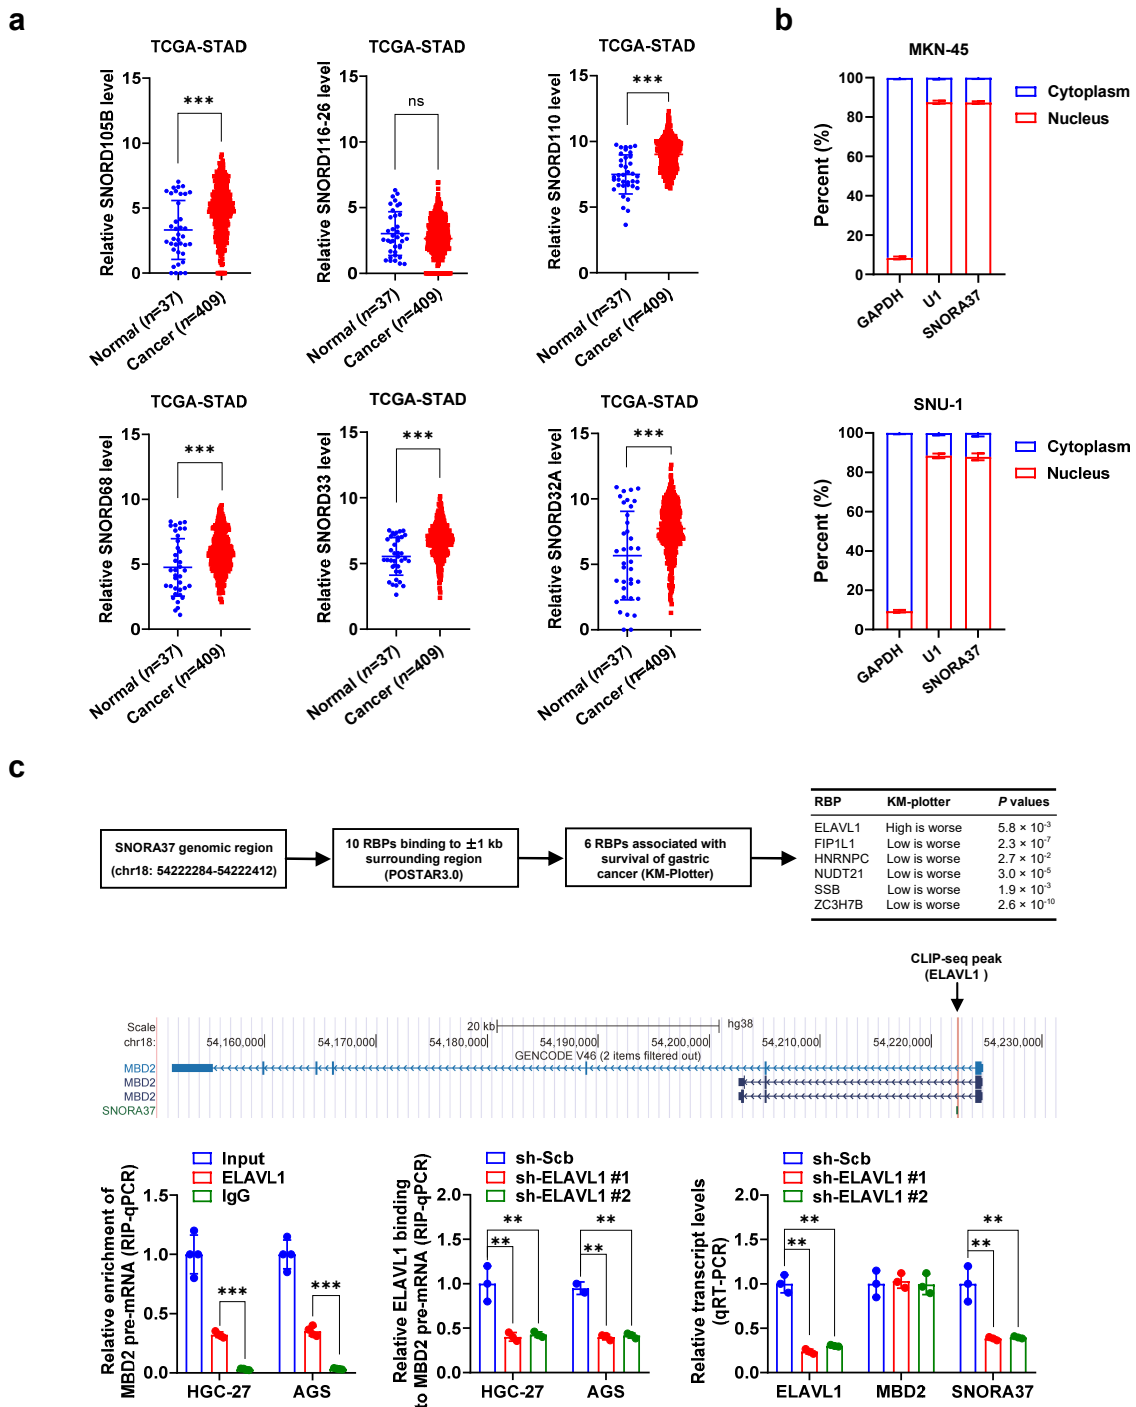

**Figure S1. Expression profiles of snoRNAs in gastric cancer tissues.** **a**, The levels of *SNORD105B*, *SNORA116-26*, *SNORD110*, *SNORD68*, *SNORD33*, and *SNORD32A* in normal gastric epithelia ( $n=37$ ) and gastric cancer tissues ( $n=409$ ) derived from TCGA datasets. **b**, Real-time qRT-PCR indicating the distribution of *SNORA37*, *GAPDH*, and *U1* in cytoplasmic and nuclear fractions of MKN-45 and SNU-1 ( $n=4$ ). **c**, Identification of potential RBPs regulating *SNORA37* expression and their association with survival of gastric cancer patients by comprehensive analysis of datasets derived from POSTAR 3.0 (<http://111.198.139.65/>) and KM-Plotter (<http://kmplot.com>) databases (upper panel). CLIP-seq dataset (middle panel) derived from ENCORI (<https://rnasysu.com/encori/>) revealing the enrichment of ELAVL1 on pre-mRNA of *SNORA37* host gene *MBD2*. RIP and qRT-PCR (lower left and middle panels) assays showing the binding of ELAVL1 (normalized to input,  $n=4$ ) to *MBD2* pre-mRNA in HGC-27 and AGS cells, and those stably transfected with scramble shRNA (sh-Scb), sh-ELAVL1 #1, or sh-ELAVL1 #2 ( $n=3$ ). Real-time qRT-PCR (lower right panel) indicating the levels (normalized to  $\beta$ -actin,  $n=3$ ) of *ELAVL1*, *MBD2*, or *SNORA37* in HGC-27 cells stably transfected with sh-Scb, sh-ELAVL1 #1, or sh-ELAVL1 #2. \*\* $P < 0.01$ , \*\*\* $P < 0.001$  vs. normal, IgG, or sh-Scb. Non-parametric Mann-Whitney U test compared the difference in **a**. One-way analysis of variance (ANOVA) compared the difference in **c**. Data are shown as mean  $\pm$  s.e.m. (error bars) or representative of three independent experiments in **a-c**.

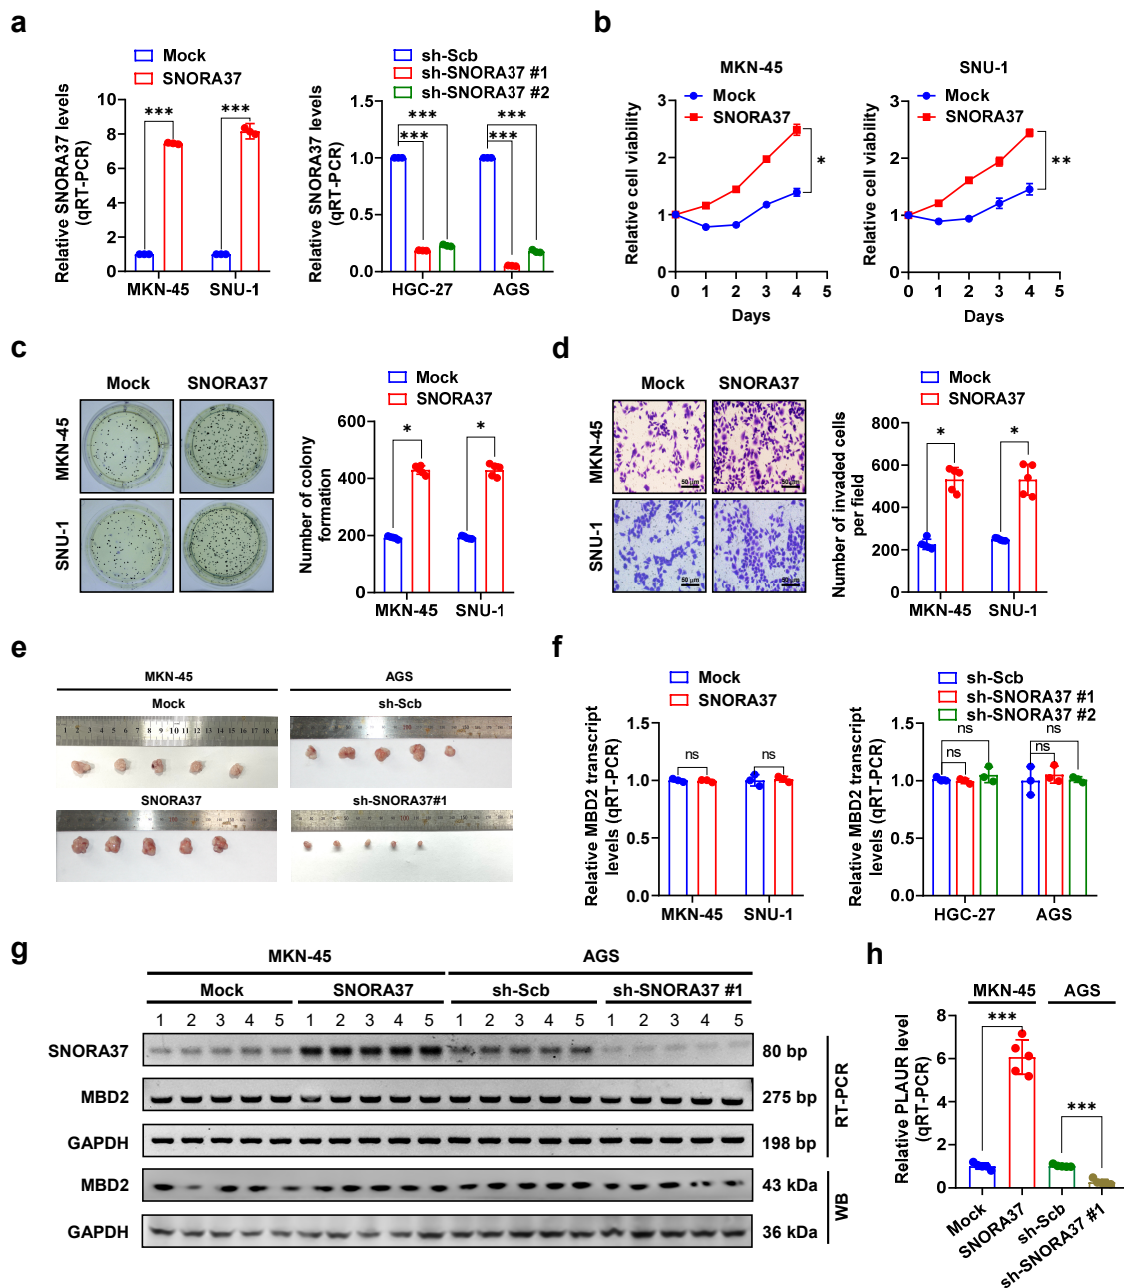

**Figure S2. Oncogenic roles of *SNORA37* in gastric cancer.** **a**, Real-time qRT-PCR assay indicating the expression of *SNORA37* (normalized to *GAPDH*) in MKN-45, SNU-1, HGC-27, and AGS cells stably transfected with empty vector (mock), *SNORA37*, scramble shRNA (sh-Scb), sh-*SNORA37* #1, or sh-*SNORA37* #2 ( $n=3$ ). **b**, MTT colorimetric assay showing the relative viability of MKN-45 and SNU-1 cells stably transfected with mock or *SNORA37* ( $n=5$ ). **c** and **d**, Representative images (left panel) and quantification (right panel) of soft agar (c) and matrigel invasion (d) assays indicating the *in vitro* growth and invasion of MKN-45 and SNU-1 cells stably transfected with mock or *SNORA37* ( $n=5$ ). **e**, Size of xenograft tumors formed by subcutaneous injection of MKN-45 cells stably transfected with mock or *SNORA37*, or AGS cells stably transfected with sh-Scb or sh-*SNORA37* #1 into dorsal flanks of nude mice ( $n = 5$  for each group). **f**, Real-time qRT-PCR assay indicating the relative *MBD2* levels (normalized to *GAPDH*) in MKN-45, SNU-1, HGC-27, and AGS cells stably transfected with mock, *SNORA37*, sh-Scb, sh-*SNORA37* #1, or sh-*SNORA37* #2 ( $n=3$ ). **g**, Real-time qRT-PCR and western blot assays indicating the levels of *SNORA37* and *MBD2* within subcutaneous xenograft tumors in nude mice formed by MKN-45 and AGS cells stably transfected with mock, *SNORA37*, sh-Scb, or sh-*SNORA37* #1 ( $n = 5$  for each group). **h**, Real-time qRT-PCR assay showing the relative levels (normalized to *GAPDH*) of *PLAUR* within liver metastatic foci formed by intravenous injection of MKN-45 and AGS cells stably transfected with mock, *SNORA37*, sh-Scb, or sh-*SNORA37* #1 ( $n = 5$  for each group). Student's *t*-test and one-way analysis of variance (ANOVA) were used to compare the difference in **a-d**, **f** and **h**. \* $P < 0.05$ , \*\*  $P < 0.01$ , \*\*\*  $P < 0.001$ . Data are shown as mean  $\pm$  s.e.m. (error bars) and representative of three independent experiments in **a-d**, **f** and **h**.

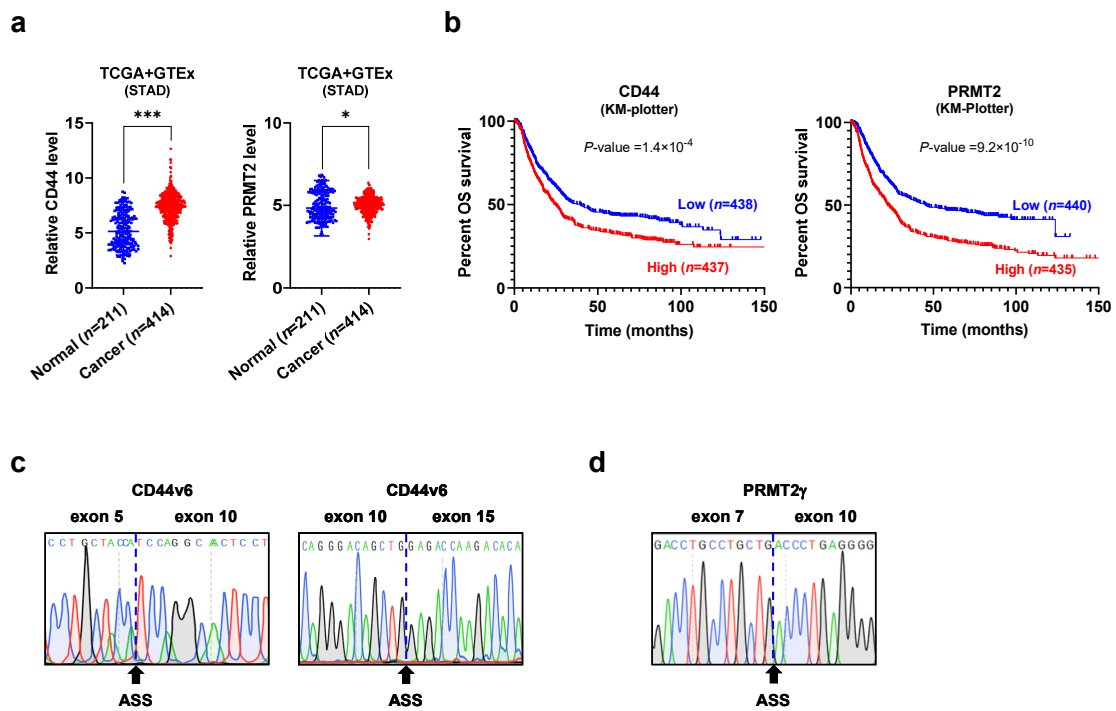

**Figure S3. Expression profiles and alternative splicing of *CD44* and *PRMT2* in gastric cancer.** **a**, Relative levels of *CD44* and *PRMT2* in normal gastric epithelia ( $n=211$ ) and tumor tissues ( $n=414$ ) of gastric cancer cases derived from TCGA (<https://cancergenome.nih.gov>) and Genotype-Tissue Expression (GTEx) database (<https://www.gtexportal.org>). **b**, Kaplan-Meier curves indicating overall survival (OS) of gastric cancer patients with low or high expression of *CD44* (cutoff value = 8.73) or *PRMT2* (cutoff value = 4.81) derived from KM-Plotter database (<http://kmplot.com>). **c**, Sanger sequencing indicating alternative splicing sites of *CD44* (C) and *PRMT2* (D) in gastric cancer AGS cells. Non-parametric Mann-Whitney U test compared the difference in **a**. Log-rank test was used for survival comparison in **b**. \* $P < 0.05$ , \*\*\*  $P < 0.001$ . ns, non-significant.

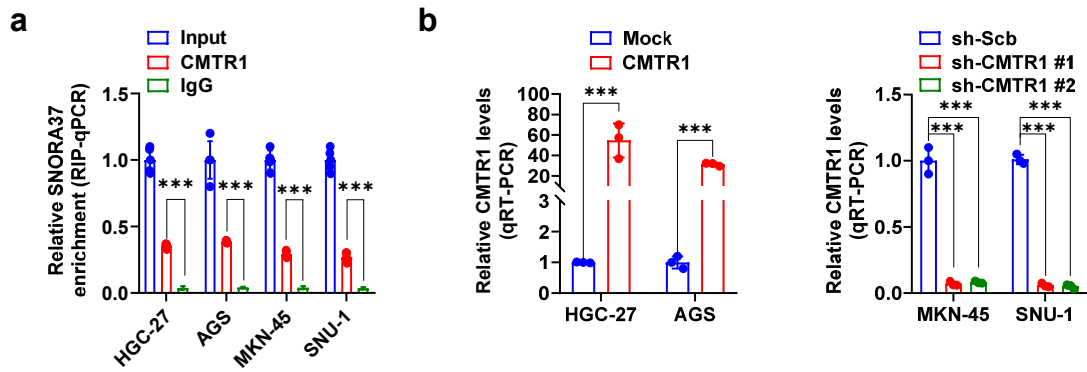

**Figure S4. *SNORA37* interacts with *CMTR1*.** **a**, RIP and real-time qRT-PCR assays showing the relative *SNORA37* levels (normalized to input,  $n=5$ ) immunoprecipitated by *CMTR1* antibody or IgG from HGC-27, AGS, MKN-45, or SNU-1 cell lysates. **b**, Real-time qRT-PCR assay indicating the expression (normalized to *GAPDH*,  $n=3$ ) of *CMTR1* in HGC-27, AGS, MKN-45, or SNU-1 cells stably transfected with empty vector (mock), *CMTR1*, scramble shRNA (sh-Scb), sh-*CMTR1* #1, or sh-*CMTR1* #2. Student's *t*-test or one-way analysis of variance (ANOVA) were used to compare the difference in **a** and **b**. \*\*\*  $P<0.001$ . Data are shown as mean  $\pm$  s.e.m. (error bars) or representative of three independent experiments in **a** and **b**.



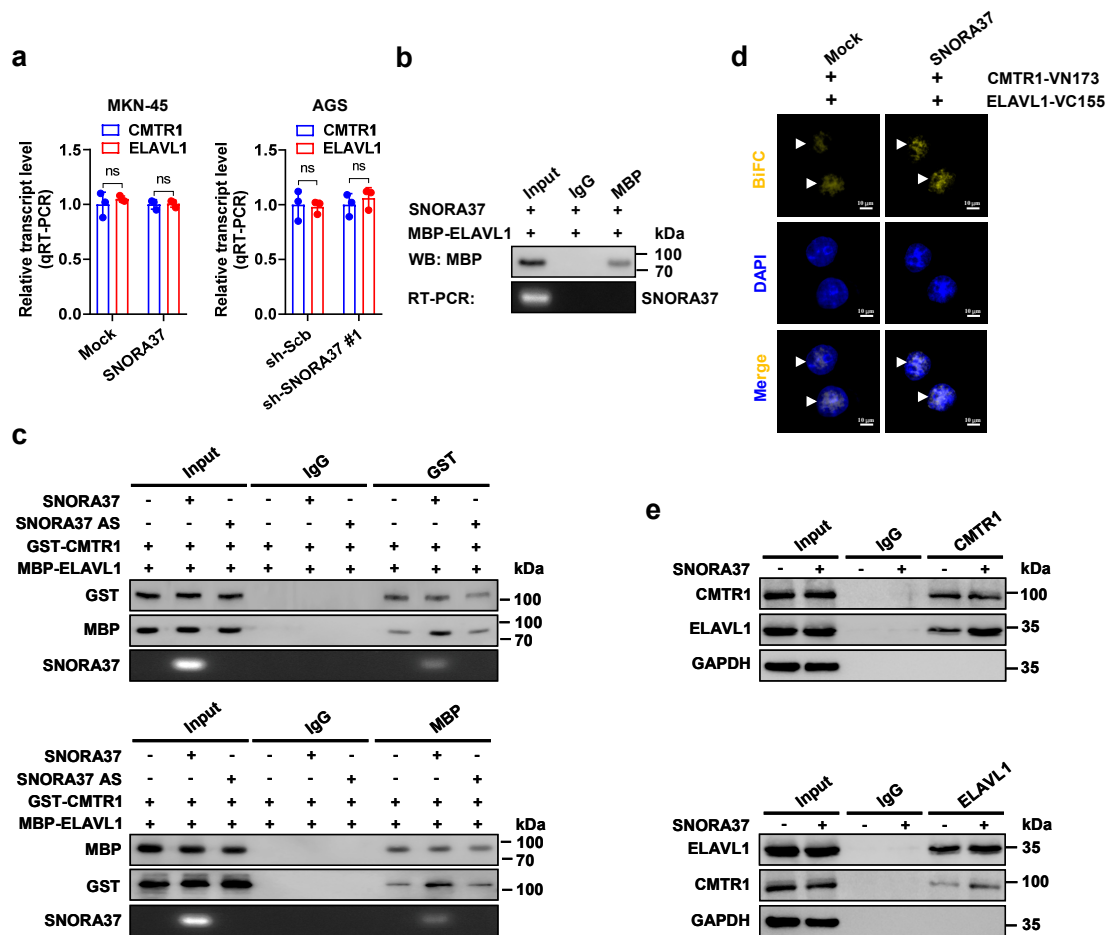

**Figure S6. *SNORA37* enhances the interaction of CMTR1 with ELAVL1.** **a**, Real-time qRT-PCR assay indicating the levels (normalized to *GAPDH*,  $n=3$ ) of *CMTR1* and *ELAVL1* in MKN-45 and AGS cells stably transfected with empty vector (mock), *SNORA37*, scramble shRNA (sh-Scb), or sh-*SNORA37* #1. **b** and **c**, *In vitro* binding assay revealing the interaction of *SNORA37* to MBP-tagged ELAVL1 protein (**b**) and that of *SNORA37* or its antisense (AS) transcript to MBP-tagged ELAVL1 and GST-tagged CMTR1 proteins (**c**). **d**, BiFC assay showing the interaction between CMTR1 and ELAVL1 (arrowheads) within MKN-45 cells co-transfected with pBiFC-VN173-CMTR1 and pBiFC-VC155-ELAVL1, and those stably transfected with mock or *SNORA37*, with nuclei staining by DAPI. **e**, Co-IP and western blot assays showing the interaction of CMTR1 with ELAVL1 in MKN-45 cells stably transfected with mock or *SNORA37*. Student's *t*-test compared the difference in **a**. ns, non-significant. Data are shown as mean  $\pm$  s.e.m. (error bars) or representative of three independent experiments in **a-e**.

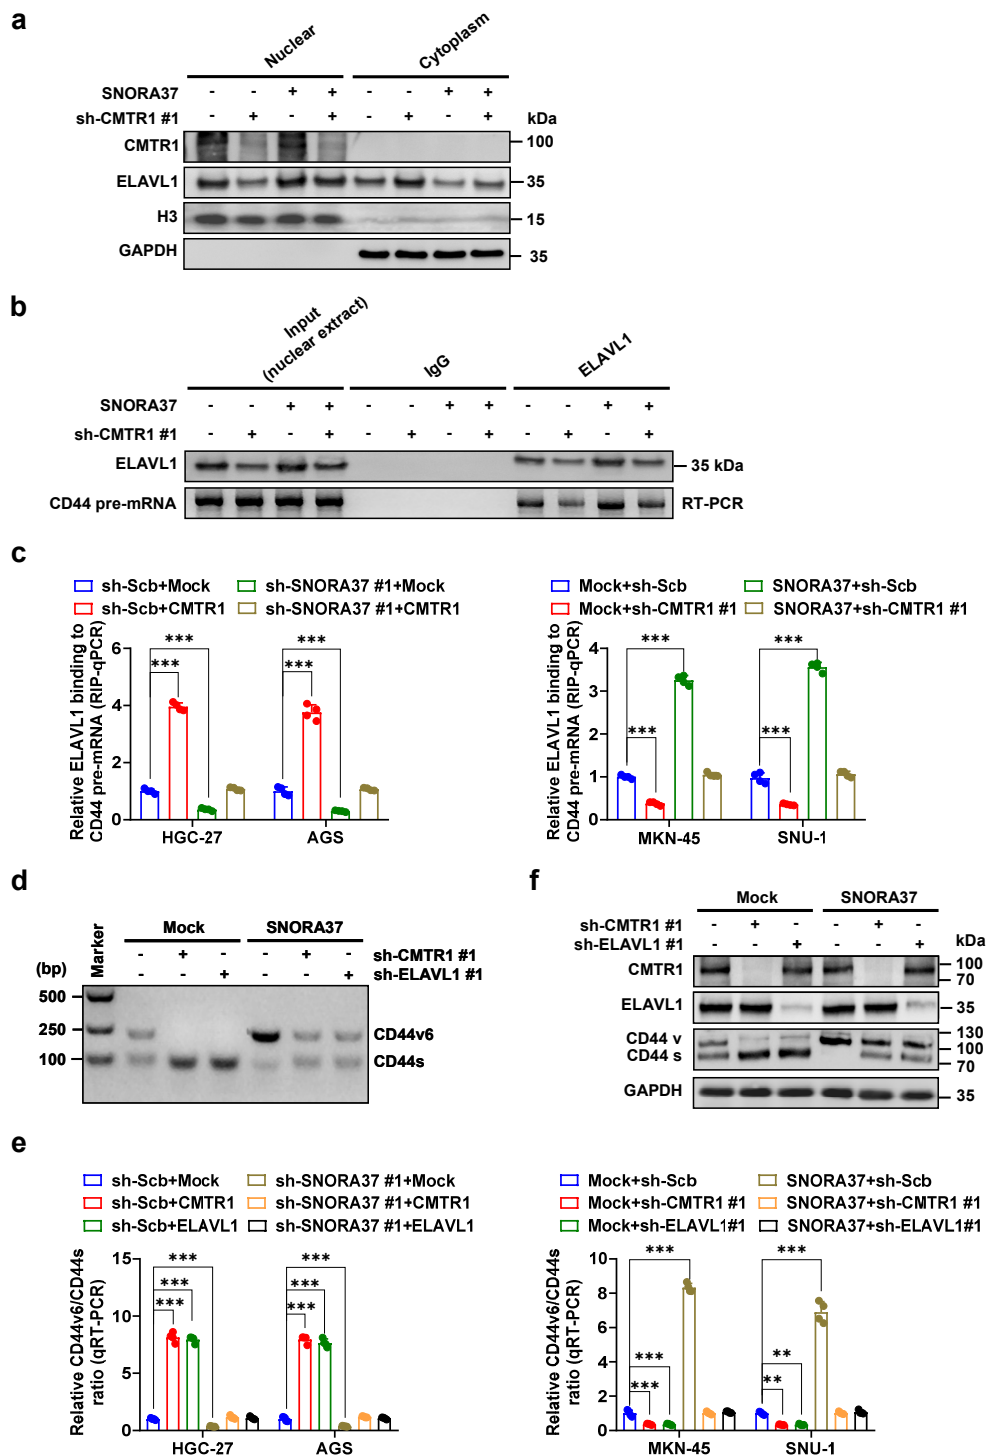

**Figure S7. *SNORA37* facilitates alternative splicing of *CD44* via *CMTR1* and *ELAVL1*.** **a**, Western blot assay showing the levels of *CMTR1* and *ELAVL1* in subcellular fractions of MKN-45 cells stably transfected with empty vector (mock) or *SNORA37*, and those co-transfected with scramble shRNA (sh-Scb) or sh-*CMTR1* #1. **b**, RIP assay indicating the interaction of *ELAVL1* with *CD44* pre-mRNA containing alternative splicing sites around exon 10 in MKN-45 cells stably transfected with mock or *SNORA37*, and those co-transfected with sh-Scb or sh-*CMTR1* #1. **c**, RIP and qRT-PCR assays showing the binding of *ELAVL1* (normalized to input,  $n=4$ ) to *CD44* pre-mRNA in gastric cancer cells stably transfected with sh-Scb, sh-*SNORA37* #1, mock, or *SNORA37*, and those co-transfected with *CMTR1* or sh-*CMTR1* #1 ( $n=4$ ). **d**, RT-PCR assay indicating the alternative splicing and expression of *CD44v6* and *CD44s* in MKN-45 cells stably transfected with mock or *SNORA37*, and those co-transfected with sh-Scb or sh-*CMTR1* #1. **e**, Real-time qRT-PCR assay showing the *CD44v6/CD44s* ratio in gastric cancer cells stably transfected with sh-Scb, sh-*SNORA37* #1, mock, or *SNORA37*, and those co-transfected with *CMTR1*, *ELAVL1*, sh-*CMTR1* #1, or sh-*ELAVL1* #1 ( $n=4$ ). **f**, Western blot assay indicating the alternative splicing and expression of *CD44v6* and *CD44s* in MKN-45 cells stably transfected with mock or *SNORA37*, and those co-transfected with sh-Scb or sh-*CMTR1* #1. One-way analysis of variance (ANOVA) were used to compare the difference in **c** and **e**. \*\*  $P<0.01$ , \*\*\*  $P<0.001$ . Data are shown as mean  $\pm$  s.e.m. (error bars) or representative of three independent experiments in **a-f**.



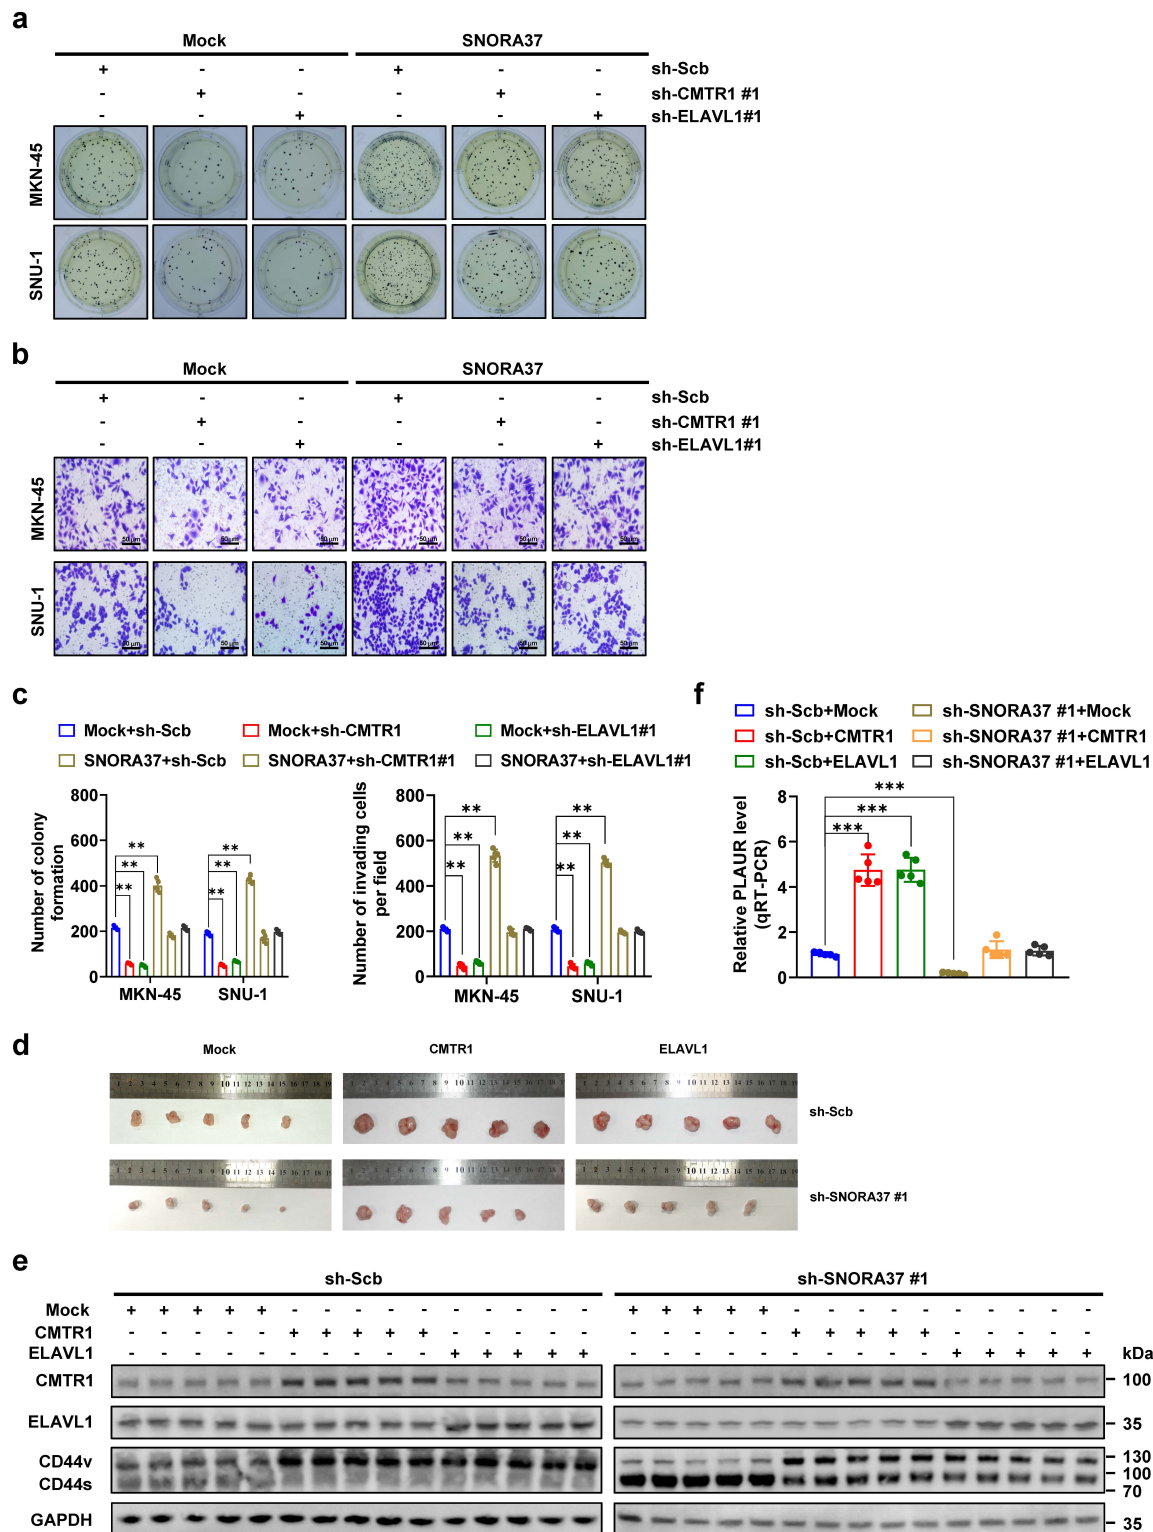

**Figure S8. *SNORA37* facilitates gastric cancer progression via enhancing interaction of CMTR1 with ELAVL1.** **a-c**, Representative images (a and b) and quantification (c) of soft agar and matrigel invasion assays indicating *in vitro* growth and invasion of MKN-45 and SNU-1 cells stably transfected with empty vector (mock) or *SNORA37*, and those co-transfected with scramble shRNA (sh-Scb), sh-CMTR1 #1, or sh-ELAVL1 #1 ( $n = 5$ ). **d**, Size of xenograft tumors formed by subcutaneous injection of HGC-27 cells stably transfected with sh-Scb or sh-SNORA37 #1, and those co-transfected with *CMTR1* or *ELAVL1* ( $n = 5$  for each group). **e**, Western blot assay indicating the relative levels of CMTR1, ELAVL1, CD44v or CD44s within subcutaneous xenograft tumors of nude mice formed by HGC-27 cells stably transfected with sh-Scb or sh-SNORA37 #1, and those co-transfected with *CMTR1* or *ELAVL1* ( $n=5$  for each group). **f**, Real-time qRT-PCR assay indicating the relative levels (normalized to *GAPDH*) of *PLAU* within liver metastatic foci formed by intravenous injection of HGC-27 cells stably transfected with sh-Scb or sh-SNORA37 #1, and those co-transfected with *CMTR1* or *ELAVL1* ( $n = 5$  for each group). One-way analysis of variance (ANOVA) was used to compare the difference in **c** and **f**. \*\* $P < 0.01$ , \*\*\*  $P < 0.001$ . Data are shown as mean  $\pm$  s.e.m. (error bars) or representative of three independent experiments in **a-f**.

**Table S1 Primer sets used for RT-PCR, RIP, and probe**

| Primer set             | Primers | Sequence                                          | Product (bp) | Application |
|------------------------|---------|---------------------------------------------------|--------------|-------------|
| SNORD116-26            | Forward | 5'-CTATAAAAAAATGGATCTCATCGG-3'                    | 76           | RT-PCR      |
|                        | Reverse | 5'-AGCTCACAGAAGTGGCACAGAAATG-3'                   |              |             |
| SNORD110               | Forward | 5'-GACTTGCGAATCAAATCTGTCAATC-3'                   | 63           | RT-PCR      |
|                        | Reverse | 5'-GCTCAGAGACATGGAGACATCAGTG-3'                   |              |             |
| SNORD105B              | Forward | 5'-CTCCACATGCGGCTGATGAC-3'                        | 76           | RT-PCR      |
|                        | Reverse | 5'-GTGCGTCAGGGCGTTTACTT-3'                        |              |             |
| SNORD68                | Forward | 5'-ATTCTCCGGAATCGCTGTACG-3'                       | 54           | RT-PCR      |
|                        | Reverse | 5'-TGGAAAAGGGTTCAAATGTGC-3'                       |              |             |
| SNORD33 (chr19)        | Forward | 5'-GGTGATGAGAACTTCTCCCACTC -3'                    | 72           | RT-PCR      |
|                        | Reverse | 5'-CAGATGGTAGTGCATGTGGAGTC-3'                     |              |             |
| SNORD32A               | Forward | 5'-AGGTCAGTGATGAGCAACATTC-3'                      | 54           | RT-PCR      |
|                        | Reverse | 5'-CTCATGGCCGTGAGACTCAAAC-3'                      |              |             |
| SNORA37                | Forward | 5'-TGAGCACTTTCACAGGTCCTCC-3'                      | 80           | RT-PCR, RIP |
|                        | Reverse | 5'-ATGCCAACAAAGGTTTTCTCTC-3'                      |              |             |
| SNORD87                | Forward | 5'-TGATGACTTAAATTACTTTTTGCCG-3'                   | 58           | RT-PCR      |
|                        | Reverse | 5'-TTATTTCTTCAAAGACAACCTCAGC-3'                   |              |             |
| MBD2                   | Forward | 5'-AAGTTCAGAAGCAAGCCTCAGTT-3'                     | 275          | RT-PCR      |
|                        | Reverse | 5'-TGTTCAATTCATTCGTTGTGGGT-3'                     |              |             |
| MBD2                   | Forward | 5'-ATGATTGTGCCTGGGCAATA-3'                        | 150          | RIP         |
|                        | Reverse | 5'-TGAGGGAGGACCTGTGAAAG-3'                        |              |             |
| CD44 (exon 5-exon 15)  | Forward | 5'-CAGACGAAGACAGTCCCTGG-3'                        | 76/205       | RT-PCR      |
|                        | Reverse | 5'-GGGTGGAATGTGTCTTGGTC-3'                        |              |             |
| CD44 pre-mRNA          | Forward | 5'-TTTCTAGCTGAAAAATTAACATT-3'                     | 522          | RIP         |
|                        | Reverse | 5'-TATCCATTCTGTTCAAGGTGACTTG-3'                   |              |             |
| CD44v6                 | Forward | 5'-CAGACGAAGACAGTCCCTGG-3'                        | 88           | RIP         |
|                        | Reverse | 5'-CTAAACCAGGCCGTGAAGC-3'                         |              |             |
| PRMT2 (exon 7-exon 10) | Forward | 5'-GCAGAACGGCTTTGCTGAC-3'                         | 183/489      | RT-PCR      |
|                        | Reverse | 5'-CTAAACCAGGCCGTGAAGC-3'                         |              |             |
| CMTR1                  | Forward | 5'-TACCAGCCGCTCTGCCAACT-3'                        | 268          | RT-PCR      |
|                        | Reverse | 5'-TGTCGTGTCTTGAACAAAGGCAT-3'                     |              |             |
| ELAVL1                 | Forward | 5'-ATGTTCTCTCGTTTTGGGCG-3'                        | 198          | RT-PCR      |
|                        | Reverse | 5'-GTTCTGGTTGGGTTGGCTG-3'                         |              |             |
| PLAUR                  | Forward | 5'-CAGCCTTACCGAGTTGTGT-3'                         | 231          | RT-PCR      |
|                        | Reverse | 5'-TCATCCTTTGGACGCCCTTC-3'                        |              |             |
| GAPDH                  | Forward | 5'-GGGCTGCTTTTAACTCTGGT-3'                        | 198          | RT-PCR      |
|                        | Reverse | 5'-TGATTTTGGAGGGATCTCGC-3'                        |              |             |
| T7+SNORA37 Sense       | Forward | 5'-TAATACGACTCACTATAGGGTGAGCACTTTCACAGGTCCTCC-3'  |              | probe       |
|                        | Reverse | 5'-AATTGTCCCATTGAATGACAGCT-3'                     |              |             |
| T7+SNORA37 Antisense   | Forward | 5'-TAATACGACTCACTATAGGGAATTGTCCCATTGAATGACAGCT-3' |              | probe       |
|                        | Reverse | 5'-TGAGCACTTTCACAGGTCCTCC-3'                      |              |             |

SNORD116-26, small nucleolar RNA, C/D box 116-26; SNORD110, small nucleolar RNA, C/D box 110; SNORD105B, small nucleolar RNA, C/D box 105B; SNORD68, small nucleolar RNA, C/D box 68; SNORD33, small nucleolar RNA, C/D box 33; SNORD32A, small nucleolar RNA, C/D box 32A; SNORA37, small nucleolar RNA, H/ACA box 37; SNORD87, small nucleolar RNA, C/D box 87; MBD2, methyl-CpG binding domain protein 2; PRMT2, protein arginine methyltransferase 2; CMTR1, cap methyltransferase 1; ELAVL1, ELAV like RNA binding protein 1; PLAUR, plasminogen activator, urokinase receptor; GAPDH, glyceraldehyde-3-phosphate dehydrogenase.

**Table S2 Primer sets used for constructs**

| Primer set                      | Primers | Sequence                                        |
|---------------------------------|---------|-------------------------------------------------|
| CV186-SNORA37                   | Forward | 5'-CGCGGATCCTGAGCACTTTACAGGTCCTCC-3'            |
|                                 | Reverse | 5'-GCGCACCGGTAATTGTCCCATTGAATGACAGCT-3'         |
| CV186-CMTR1                     | Forward | 5'-CAGGTCGACTCTAGAGGATCCATGAAGAGGAGAACTGACCC-3' |
|                                 | Reverse | 5'-ATCCTTGTAGTCCATACCGGTTTAGGCCCTGTGCATCTGGA-3' |
| pCMV-HA-CMTR1                   | Forward | 5'-ACGCGTCGACGATGAAGAGGAGAACTGACCC-3'           |
|                                 | Reverse | 5'-ATTTGCGGCCGCTTAGGCCCTGTGCATCTGGA-3'          |
| pCMV-HA-CMTR1-ΔNLS              | Forward | 5'-ACGCGTCGACGTCCATGTATAATAGCGTCTC-3'           |
|                                 | Reverse | 5'-ATTTGCGGCCGCTTAGGCCCTGTGCATCTGGA-3'          |
| pCMV-HA-CMTR1-ΔNLS-G-patch      | Forward | 5'-ACGCGTCGACGAAATGAGCGATTGGATGGT-3'            |
|                                 | Reverse | 5'-ATTTGCGGCCGCTTAGGCCCTGTGCATCTGGA-3'          |
| pCMV-HA-CMTR1-ΔNLS-G-patch-WW   | Forward | 5'-ACGCGTCGACGAAATGAGCGATTGGATGGT-3'            |
|                                 | Reverse | 5'-ATTTGCGGCCGCTTAGGCCCTGTGCATCTGGA-3'          |
| pGEX-6p-1-CMTR1                 | Forward | 5'-ACGCGTCGACGGATGAAGAGGAGAACTGACCC-3'          |
|                                 | Reverse | 5'-ATTTGCGGCCGCTTAGGCCCTGTGCATCTGGA-3'          |
| pGEX-6p-1-CMTR1-ΔNLS            | Forward | 5'-ACGCGTCGACGGTCCATGTATAATAGCGTCTC-3'          |
|                                 | Reverse | 5'-ATTTGCGGCCGCTTAGGCCCTGTGCATCTGGA-3'          |
| pGEX-6p-1-CMTR1-ΔNLS-G-patch    | Forward | 5'-ACGCGTCGACGGGAAATGAGCGATTGGATGGT-3'          |
|                                 | Reverse | 5'-ATTTGCGGCCGCTTAGGCCCTGTGCATCTGGA-3'          |
| pGEX-6p-1-CMTR1-ΔNLS-G-patch-WW | Forward | 5'-ACGCGTCGACGGGAAATGAGCGATTGGATGGT-3'          |
|                                 | Reverse | 5'-ATTTGCGGCCGCTTAGGCCCTGTGCATCTGGA-3'          |
| pMAL-c4X-ELAVL1                 | Forward | 5'-CCGGAATTCATGTCTAATGGTTATGAAGACC-3'           |
|                                 | Reverse | 5'-ACGCGTCGACTTATTTGTGGGACTTGTTGGTT-3'          |
| pMAL-c4X-ELAVL1-ΔRRM3           | Forward | 5'-CCGGAATTCATGTCTAATGGTTATGAAGACC-3'           |
|                                 | Reverse | 5'-ACGCGTCGACCCAGCCGGAGGAGGCGTTT-3'             |
| pMAL-c4X-ELAVL1-RRM2+H          | Forward | 5'-CCGGAATTCATCAAAGACGCCAACTTGTACA-3'           |
|                                 | Reverse | 5'-ACGCGTCGACCCAGCCGGAGGAGGCGTTT-3'             |
| pMAL-c4X-ELAVL1-RRM2            | Forward | 5'-CCGGAATTCATCAAAGACGCCAACTTGTACA-3'           |
|                                 | Reverse | 5'-ACGCGTCGACCTGGTTGGGTTGGCTGCA-3'              |
| pBiFC-CMTR1-VN173               | Forward | 5'-CGCGCGGCCGCGATGAAGAGGAGAACTGACCC-3'          |
|                                 | Reverse | 5'-CGCGGTACCGCGGCCCTGTGCATCTGGATGA-3'           |
| pBiFC-ELAVL1-VC155              | Forward | 5'-CCGGAATTCGGATGTCTAATGGTTATGAAGA-3'           |
|                                 | Reverse | 5'-CCGCTCGAGTTTGTGGGACTTGTTGGTTT-3'             |

SNORA37, small nucleolar RNA, H/ACA box 37; CMTR1, cap methyltransferase 1; ELAVL1, ELAV like RNA binding protein 1.

**Table S3 Oligonucleotide sets for short hairpin RNAs**

| Primer set    | Sequence                                                                                                                                                     |
|---------------|--------------------------------------------------------------------------------------------------------------------------------------------------------------|
| sh-Scb        | 5'-AGGGATACAAGCATATACCACTCGAGTGGTATATGCTTGTATCCCTC-3' (sense);<br>5'-GAGGGATACAAGCATATACCACTCGAGTGGTATATGCTTGTATCCCT-3' (antisense)                          |
| sh-SNORA37 #1 | 5'-CCGGTCTGTCATTCAATGGGACAATTCTCGAGAATTGTCCCATTGAATGACAGTTTTTTG-3' (sense)<br>5'-GATCCAAAAACTGTCATTCAATGGGACAATTCTCGAGAATTGTCCCATTGAATGACAGA-3' (antisense)  |
| sh-SNORA37 #2 | 5'-CCGGTGGTAGCTGGTGCTGAGAGAAACTCGAGTTTCTCTCAGCACCAGCTACCTTTTTG-3' (sense)<br>5'-GATCCAAAAAGGTAGCTGGTGCTGAGAGAAACTCGAGTTTCTCTCAGCACCAGCTACCA-3' (antisense)   |
| sh-CMTR1 #1   | 5'-CCGGTGCATGCAAAGGGCTTTGGAATCTCGAGATTCCAAAGCCCTTTGCATGCTTTTTG-3' (sense)<br>5'-GATCCAAAAAGCATGCAAAGGGCTTTGGAATCTCGAGATTCCAAAGCCCTTTGCATGCA-3' (antisense)   |
| sh-CMTR1 #2   | 5'-CCGGTGCATAGATGATGTTTCGGGATTCTCGAGAATCCCGAACATCATCTATGCTTTTTG-3' (sense)<br>5'-GATCCAAAAAGCATAGATGATGTTTCGGGATTCTCGAGAATCCCGAACATCATCTATGCA-3' (antisense) |
| sh-ELAVL1 #1  | 5'-CCGGACCATGACAAACTATGAAGAACTCGAGTTCTTCATAGTTTGTGATGGTTTTTTG -3' (sense);<br>5'-GATCCAAAAACCATGACAAACTATGAAGAACTCGAGTTCTTCATAGTTTGTGATGGT-3' (antisense)    |
| sh-ELAVL1 #2  | 5'-CCGGCCCATCACAGTGAAGTTTGCCTCGAGTGCAAACCTTCACTGTGATGGGTTTTTTG-3' (sense);<br>5'-GATCCAAAAACCCATCACAGTGAAGTTTGCCTCGAGTGCAAACCTTCACTGTGATGGG-3' (antisense)   |

SNORA37, small nucleolar RNA, H/ACA box 37; CMTR1, cap methyltransferase 1; ELAVL1, ELAV like RNA binding protein 1.

**Table S4 Differentially expressed snoRNAs in RNA-seq assay**

| <b>Gene ID</b> | <b>P-Value</b> | <b>logFC</b> |
|----------------|----------------|--------------|
| SNORD105B      | 2.02E-02       | 3.814643318  |
| SNORD116-26    | 2.45E-02       | 3.730589199  |
| SNORA37        | 1.77E-02       | 2.169396966  |
| SNORD110       | 3.52E-02       | 1.367205527  |
| SNORD68        | 4.60E-02       | 1.171923731  |
| SNORD87        | 2.30E-02       | 1.165189333  |
| SNORD33        | 2.66E-02       | 1.142674046  |
| SNORD32A       | 4.65E-02       | 1.03081066   |
| SNORD91B       | 4.47E-02       | -1.090525745 |
| SNORD58        | 3.18E-02       | -1.144579757 |
| SNORD28        | 2.04E-02       | -1.677140888 |
| SNORD116-25    | 3.72E-02       | -2.137392071 |
| SNORA28        | 2.38E-02       | -2.474951099 |
| SNORA42        | 1.80E-02       | -2.764101686 |

**Table S5 Alteration of splicing events in MKN-45 cells upon SNORA37 over-expression**

| Gene (top 60) | AS type | Chromosome | P-value  | $\Delta$ PSI |
|---------------|---------|------------|----------|--------------|
| AAK1          | SE      | chr2       | 4.31E-14 | 0.878        |
| ABI3BP        | SE      | chr3       | 2.74E-06 | 0.583        |
| ANAPC15       | A5SS    | chr11      | 1.44E-08 | 0.874        |
| ANXA7         | SE      | chr10      | 9.23E-03 | 0.534        |
| CCDC78        | MXE     | chr16      | 1.33E-05 | -0.597       |
| CCM2          | SE      | chr7       | 5.11E-13 | -0.796       |
| CD44          | SE      | chr12      | 4.78E-07 | 0.667        |
| COA1          | SE      | chr7       | 8.30E-04 | 0.537        |
| COL16A1       | SE      | chr1       | 2.15E-03 | -0.556       |
| CTDSPL        | SE      | chr3       | 9.07E-06 | -0.667       |
| DTX2          | SE      | chr7       | 2.88E-07 | -0.556       |
| EEF1D         | SE      | chr8       | 1.39E-04 | 0.598        |
| EPHA10        | SE      | chr1       | 2.71E-02 | 0.545        |
| FAM49B        | MXE     | chr8       | 2.49E-04 | -0.552       |
| FANCL         | SE      | chr2       | 3.60E-06 | -0.582       |
| FXR1          | SE      | chr3       | 9.17E-05 | -0.577       |
| GDPD5         | SE      | chr11      | 1.36E-07 | 0.743        |
| GRB10         | SE      | chr7       | 1.31E-04 | 0.535        |
| HACL1         | SE      | chr3       | 1.68E-08 | -0.872       |
| HARS2         | SE      | chr5       | 3.83E-05 | -0.569       |
| IFI27L1       | SE      | chr14      | 5.82E-08 | -0.729       |
| IL20RA        | MXE     | chr6       | 8.42E-05 | -0.621       |
| KLHL3         | SE      | chr5       | 3.50E-05 | 0.599        |
| KLK8          | SE      | chr19      | 1.09E-08 | 0.7          |
| LRRC23        | SE      | chr12      | 8.35E-05 | 0.576        |
| METAP2        | SE      | chr12      | 5.33E-04 | 0.57         |
| MGME1         | A5SS    | chr20      | 3.63E-03 | -0.58        |
| MTHFSD        | SE      | chr16      | 3.47E-08 | 0.852        |
| MTIF3         | SE      | chr13      | 1.21E-08 | 0.723        |
| NDUFC1        | SE      | chr4       | 2.65E-06 | 0.604        |
| NPRL3         | SE      | chr16      | 2.85E-03 | 0.727        |
| NQO2          | SE      | chr6       | 5.74E-09 | -0.543       |
| NSMCE2        | SE      | chr8       | 9.23E-03 | -0.667       |
| PILRB         | A5SS    | chr7       | 1.43E-05 | -0.528       |
| PNPLA6        | A5SS    | chr19      | 3.02E-04 | -0.529       |
| POU5F1        | RI      | chr6       | 2.48E-06 | 0.609        |
| PPP1R3E       | SE      | chr14      | 8.04E-06 | 0.562        |
| PPRC1         | SE      | chr10      | 5.01E-08 | -0.617       |
| PRMT2         | SE      | chr8       | 1.39E-04 | -0.742       |
| PSME2         | A5SS    | chr14      | 2.85E-04 | 0.517        |
| PXMP4         | SE      | chr20      | 7.00E-05 | 0.545        |
| RACGAP1       | SE      | chr12      | 1.09E-03 | 0.555        |
| RAD51D        | SE      | chr17      | 1.42E-06 | -0.603       |
| RBPMS         | SE      | chr8       | 1.33E-02 | 0.518        |
| RPGRIP1L      | SE      | chr16      | 9.74E-07 | -0.664       |
| RRP8          | SE      | chr11      | 6.44E-03 | -0.591       |
| RTN3          | SE      | chr11      | 7.17E-04 | -0.667       |
| SLC37A4       | A5SS    | chr11      | 1.75E-06 | -0.609       |
| SLC6A9        | SE      | chr1       | 3.03E-03 | -0.585       |
| SLCO2A1       | SE      | chr3       | 2.23E-03 | 0.558        |
| SMTN          | SE      | chr22      | 3.30E-03 | -0.562       |
| SPC24         | SE      | chr19      | 6.91E-07 | 0.51         |
| SPINK5        | SE      | chr5       | 2.98E-06 | 0.609        |
| STK33         | SE      | chr11      | 1.17E-05 | -0.607       |
| TMEM161B-AS1  | SE      | chr5       | 3.89E-07 | 0.618        |
| TRPV2         | SE      | chr17      | 4.64E-02 | -0.539       |
| TSGA10        | SE      | chr2       | 4.96E-10 | 0.832        |
| WBSCR22       | SE      | chr7       | 3.68E-06 | -0.54        |
| ZBTB8OS       | SE      | chr1       | 1.22E-02 | -0.529       |
| ZFYVE27       | SE      | chr10      | 2.94E-02 | 0.545        |

AS, alteration splicing; SE, skipping exon; A5SS, alternative 5' splice sites; MXE, mutually exclusive exons.

**Table S6 Alteration of splicing events in gastric tissues**

| Gene (top 60) | AS type | Chromosome | P value  | ΔPSI   |
|---------------|---------|------------|----------|--------|
| AC004076.9    | SE      | chr19      | 1.75E-06 | 0.656  |
| AC034220.3    | MXE     | chr5       | 4.46E-08 | -0.612 |
| ARPC1B        | A3SS    | chr7       | 4.01E-06 | 0.845  |
| BDH1          | SE      | chr3       | 9.34E-07 | 0.753  |
| BORA          | SE      | chr13      | 2.58E-08 | -0.605 |
| CACNA2D1      | A3SS    | chr7       | 5.66E-12 | -0.721 |
| CCDC18-AS1    | SE      | chr1       | 8.60E-07 | 0.602  |
| CCDC81        | SE      | chr11      | 2.66E-02 | -0.667 |
| CD44          | SE      | chr21      | 9.28E-04 | 0.585  |
| CEP295        | A3SS    | chr11      | 1.29E-04 | 0.61   |
| CPSF3L        | SE      | chr1       | 1.90E-04 | -0.746 |
| DOCK9         | MXE     | chr13      | 1.73E-03 | 0.779  |
| DST           | SE      | chr6       | 1.47E-07 | 0.616  |
| DTNB          | SE      | chr2       | 1.94E-05 | -0.649 |
| ELMOD3        | SE      | chr2       | 6.38E-06 | 0.613  |
| ENC1          | SE      | chr5       | 1.45E-12 | 0.67   |
| EP400NL       | SE      | chr12      | 1.59E-06 | 0.695  |
| ESRP1         | SE      | chr8       | 4.41E-05 | 0.622  |
| EXO5          | SE      | chr1       | 6.32E-08 | -0.667 |
| FLT3LG        | A3SS    | chr19      | 3.14E-08 | -0.74  |
| GTPBP3        | A3SS    | chr19      | 5.49E-04 | -0.637 |
| HKR1          | SE      | chr19      | 1.56E-03 | -0.726 |
| LINC00893     | SE      | chrX       | 5.65E-03 | 0.614  |
| LRRC37A2      | SE      | chr17      | 9.97E-05 | -0.823 |
| MAPK8         | SE      | chr10      | 1.74E-10 | -0.602 |
| METTL21B      | SE      | chr12      | 9.32E-06 | -0.732 |
| MOK           | A3SS    | chr14      | 4.23E-05 | -0.585 |
| NCOA3         | A5SS    | chr20      | 9.84E-11 | 0.729  |
| NDE1          | SE      | chr16      | 6.22E-07 | -0.667 |
| NUDT13        | SE      | chr10      | 1.85E-03 | 0.653  |
| PRMT2         | SE      | chr5       | 2.38E-06 | -0.696 |
| PSEN1         | SE      | chr14      | 5.68E-07 | -0.662 |
| PUM2          | SE      | chr2       | 1.60E-08 | -0.688 |
| RFWD2         | SE      | chr1       | 1.06E-03 | 0.593  |
| SEMA4C        | A3SS    | chr2       | 7.60E-05 | 0.634  |
| SIGLEC11      | MXE     | chr19      | 3.07E-12 | 0.883  |
| SIGLEC11      | SE      | chr19      | 4.88E-07 | -0.747 |
| SLC12A8       | SE      | chr3       | 2.09E-07 | -0.687 |
| SLC25A19      | SE      | chr17      | 1.10E-07 | 0.736  |
| SLC43A3       | SE      | chr11      | 4.14E-03 | 0.583  |
| SPET-4        | SE      | chr2       | 3.99E-08 | 0.805  |
| ST7L          | MXE     | chr1       | 6.21E-07 | 0.583  |
| TBC1D5        | SE      | chr3       | 1.10E-07 | -0.801 |
| TCF3          | RI      | chr19      | 5.40E-03 | -0.637 |
| TEX9          | SE      | chr15      | 1.96E-02 | -0.618 |
| TRIM6         | SE      | chr11      | 5.22E-06 | -0.695 |
| TRIQQ         | SE      | chr8       | 1.03E-03 | 0.665  |
| TTC23         | SE      | chr15      | 6.16E-06 | -0.609 |
| TTC8          | SE      | chr14      | 6.77E-08 | 0.602  |
| ULK4          | MXE     | chr3       | 5.45E-11 | 0.679  |
| UPP1          | SE      | chr7       | 1.66E-05 | 0.667  |
| ZNF226        | RI      | chr19      | 6.68E-09 | 0.809  |
| ZNF3          | SE      | chr7       | 7.61E-11 | -0.652 |
| ZNF346        | MXE     | chr5       | 4.29E-08 | 0.784  |
| ZNF35         | A5SS    | chr3       | 1.62E-07 | 0.684  |
| ZNF415        | MXE     | chr19      | 1.66E-06 | -0.595 |
| ZNF551        | SE      | chr19      | 3.83E-07 | -0.597 |
| ZNF585B       | SE      | chr19      | 3.12E-07 | -0.586 |
| ZNF611        | SE      | chr19      | 5.65E-08 | 0.585  |
| ZNF7          | A3SS    | chr8       | 9.08E-07 | -0.616 |

AS, alteration splicing; SE, skipping exon; MXE, mutually exclusive exons; A3SS, alternative 3' splice sites; A5SS, alternative 5' splice sites.

**Table S7 Mass spectrometry analysis of proteins pulled down by SNORA37**

---

|         |         |            |        |
|---------|---------|------------|--------|
| ADPRS   | GOLGB1  | POLR1B     | ZNF106 |
| AKAP17A | GTPBP1  | POLR1E     | ZNF668 |
| APOE    | IFIT3   | POLR3G     | ZRANB3 |
| BAG3    | IL13    | PSMD8      | ZSWIM5 |
| BNC2    | ISG20L2 | RAP2B      |        |
| BRPF3   | KCMF1   | RBFOX1     |        |
| CBX2    | KCNJ10  | RFC5       |        |
| CEP250  | KRIT1   | RHBDD2     |        |
| CISD2   | LGALS1  | RPA1       |        |
| CLASP1  | LRRC14  | SDF2L1     |        |
| CMTR1   | MDN1    | SEC24A     |        |
| COMMD4  | MED9    | SNX29      |        |
| CRK     | MLH1    | SP110      |        |
| CRYZ    | MLLT3   | SPAST      |        |
| CSN1S1  | MRE11   | SPDL1      |        |
| CSNK1E  | MROH2A  | ST3GAL4    |        |
| DAD1    | MRPS28  | ST6GALNAC5 |        |
| DCAKD   | MSI2    | TBC1D15    |        |
| DDX19A  | MSX2    | TFB1M      |        |
| DEFB113 | MX1     | TFIP11     |        |
| DIAPH3  | MYRF    | TMEM97     |        |
| DYTN    | NDUFS4  | TOLLIP     |        |
| ENSA    | NT5C3A  | TRIM61     |        |
| EPN3    | NVL     | UGT8       |        |
| ERI1    | PAK4    | UTP4       |        |
| ESF1    | PCOLCE  | VKORC1L1   |        |
| FKBP8   | PDP1    | XRCC4      |        |
| FNDC3B  | PI3     | YES1       |        |
| FOCAD   | PICALM  | ZCCHC17    |        |
| GNG12   | PNPLA2  | ZFC3H1     |        |

---
